# Supplementary material
Source: MDPI journal article supplement (https://www.mdpi.com/1424-2818/14/8/681)
Supplement: s1 [file s1]

|               |                 |               |                                       |                   | Habitat Classifications |                         |            |            |
|---------------|-----------------|---------------|---------------------------------------|-------------------|-------------------------|-------------------------|------------|------------|
| Class         | Order           | Family        | Binomial                              | Red List Category | Lagoon                  | Seagrass and Macroalgae | Coral Reef | Deep-water |
| Actinpterygii | Acanthuriformes | Acanthuridae  | <i>Acanthurus auranticavus</i>        | LC                | 1                       | 0                       | 1          | 0          |
| Actinpterygii | Acanthuriformes | Acanthuridae  | <i>Acanthurus dussumieri</i>          | LC                | 1                       | 0                       | 1          | 0          |
| Actinpterygii | Acanthuriformes | Acanthuridae  | <i>Acanthurus leucocheilus</i>        | LC                | 1                       | 0                       | 1          | 0          |
| Actinpterygii | Acanthuriformes | Acanthuridae  | <i>Acanthurus leucosternon</i>        | LC                | 0                       | 0                       | 1          | 0          |
| Actinpterygii | Acanthuriformes | Acanthuridae  | <i>Acanthurus lineatus</i>            | LC                | 1                       | 0                       | 1          | 0          |
| Actinpterygii | Acanthuriformes | Acanthuridae  | <i>Acanthurus mata</i>                | LC                | 0                       | 0                       | 1          | 0          |
| Actinpterygii | Acanthuriformes | Acanthuridae  | <i>Acanthurus nigricauda</i>          | LC                | 1                       | 0                       | 1          | 0          |
| Actinpterygii | Acanthuriformes | Acanthuridae  | <i>Acanthurus nigrofuscus</i>         | LC                | 1                       | 0                       | 1          | 0          |
| Actinpterygii | Acanthuriformes | Acanthuridae  | <i>Acanthurus tennentii</i>           | LC                | 1                       | 0                       | 1          | 0          |
| Actinpterygii | Acanthuriformes | Acanthuridae  | <i>Acanthurus thompsoni</i>           | LC                | 0                       | 0                       | 1          | 0          |
| Actinpterygii | Acanthuriformes | Acanthuridae  | <i>Acanthurus triostegus</i>          | LC                | 1                       | 0                       | 1          | 0          |
| Actinpterygii | Acanthuriformes | Acanthuridae  | <i>Acanthurus xanthopterus</i>        | LC                | 1                       | 0                       | 1          | 0          |
| Actinpterygii | Acanthuriformes | Acanthuridae  | <i>Ctenochaetus binotatus</i>         | LC                | 1                       | 0                       | 1          | 0          |
| Actinpterygii | Acanthuriformes | Acanthuridae  | <i>Ctenochaetus striatus</i>          | LC                | 1                       | 0                       | 1          | 0          |
| Actinpterygii | Acanthuriformes | Acanthuridae  | <i>Ctenochaetus truncatus</i>         | LC                | 0                       | 0                       | 1          | 0          |
| Actinpterygii | Acanthuriformes | Acanthuridae  | <i>Naso brachycentron</i>             | LC                | 0                       | 0                       | 1          | 0          |
| Actinpterygii | Acanthuriformes | Acanthuridae  | <i>Naso brevirostris</i>              | LC                | 1                       | 0                       | 1          | 1          |
| Actinpterygii | Acanthuriformes | Acanthuridae  | <i>Naso elegans</i>                   | LC                | 1                       | 0                       | 1          | 0          |
| Actinpterygii | Acanthuriformes | Acanthuridae  | <i>Naso hexacanthus</i>               | LC                | 1                       | 0                       | 1          | 0          |
| Actinpterygii | Acanthuriformes | Acanthuridae  | <i>Naso thynnoides</i>                | LC                | 0                       | 0                       | 1          | 0          |
| Actinpterygii | Acanthuriformes | Acanthuridae  | <i>Naso tuberosus</i>                 | DD                | 0                       | 0                       | 1          | 0          |
| Actinpterygii | Acanthuriformes | Acanthuridae  | <i>Naso unicornis</i>                 | LC                | 1                       | 0                       | 1          | 0          |
| Actinpterygii | Acanthuriformes | Acanthuridae  | <i>Naso vlamingii</i>                 | LC                | 1                       | 0                       | 1          | 0          |
| Actinpterygii | Acanthuriformes | Acanthuridae  | <i>Paracanthurus hepatus</i>          | LC                | 0                       | 0                       | 1          | 0          |
| Actinpterygii | Acanthuriformes | Acanthuridae  | <i>Zebrasoma desjardinii</i>          | LC                | 1                       | 0                       | 1          | 0          |
| Actinpterygii | Acanthuriformes | Acanthuridae  | <i>Zebrasoma scopas</i>               | LC                | 1                       | 0                       | 1          | 0          |
| Actinpterygii | Albuliformes    | Albulidae     | <i>Albula glossodonta</i>             | VU                | 1                       | 1                       | 1          | 0          |
| Actinpterygii | Lophiiformes    | Antennariidae | <i>Histrio histrio</i>                | LC                | 0                       | 0                       | 0          | 1          |
| Actinpterygii | Kurtiformes     | Apogonidae    | <i>Apogon semiornatus</i>             | NE                | 0                       | 0                       | 1          | 0          |
| Actinpterygii | Kurtiformes     | Apogonidae    | <i>Cheilodipterus macrodon</i>        | NE                | 1                       | 0                       | 1          | 0          |
| Actinpterygii | Kurtiformes     | Apogonidae    | <i>Cheilodipterus quinquelineatus</i> | NE                | 1                       | 0                       | 1          | 0          |

|               |                  |              |                                       |    |   |   |   |   |
|---------------|------------------|--------------|---------------------------------------|----|---|---|---|---|
| Actinpterygii | Kurtiformes      | Apogonidae   | <i>Fowleria variegata</i>             | NE | 1 | 1 | 1 | 0 |
| Actinpterygii | Kurtiformes      | Apogonidae   | <i>Nectamia cf. zebrinus</i>          | LC | 0 | 0 | 1 | 0 |
| Actinpterygii | Kurtiformes      | Apogonidae   | <i>Ostorhinchus angustatus</i>        | NE | 1 | 0 | 1 | 0 |
| Actinpterygii | Kurtiformes      | Apogonidae   | <i>Ostorhinchus apogonoides</i>       | NE | 0 | 0 | 1 | 0 |
| Actinpterygii | Kurtiformes      | Apogonidae   | <i>Ostorhinchus cyanosoma</i>         | NE | 1 | 0 | 1 | 0 |
| Actinpterygii | Kurtiformes      | Apogonidae   | <i>Ostorhinchus nigrofasciatus</i>    | NE | 1 | 0 | 1 | 0 |
| Actinpterygii | Kurtiformes      | Apogonidae   | <i>Pristiapogon freanatus</i>         | NE | 1 | 0 | 1 | 0 |
| Actinpterygii | Kurtiformes      | Apogonidae   | <i>Pristiapogon kallopterus</i>       | NE | 1 | 0 | 1 | 0 |
| Actinpterygii | Kurtiformes      | Apogonidae   | <i>Rhabdamia gracilis</i>             | NE | 1 | 0 | 1 | 0 |
| Actinpterygii | Kurtiformes      | Apogonidae   | <i>Verulux cypselurus</i>             | NE | 1 | 0 | 1 | 0 |
| Actinpterygii | Kurtiformes      | Apogonidae   | <i>Zapogon evermanni</i>              | LC | 0 | 0 | 1 | 1 |
| Actinpterygii | Kurtiformes      | Apogonidae   | <i>Zoramia cf. sangiensis</i>         | NE | 1 | 0 | 1 | 0 |
| Actinpterygii | Kurtiformes      | Apogonidae   | <i>Zoramia leptacantha</i>            | NE | 1 | 0 | 1 | 0 |
| Actinpterygii | Atheriniformes   | Atherinidae  | <i>Atherinomorus lacunosus</i>        | NE | 1 | 1 | 1 | 0 |
| Actinpterygii | Atheriniformes   | Atherinidae  | <i>Hypoatherina barnesi</i>           | NE | 1 | 1 | 1 | 0 |
| Actinpterygii | Sygnathiformes   | Aulostomidae | <i>Aulostomus chinensis</i>           | LC | 1 | 0 | 1 | 0 |
| Actinpterygii | Tetradontiformes | Balistidae   | <i>Balistapus undulatus</i>           | NE | 1 | 0 | 1 | 0 |
| Actinpterygii | Tetradontiformes | Balistidae   | <i>Balistoides conspicillum</i>       | NE | 0 | 0 | 1 | 0 |
| Actinpterygii | Tetradontiformes | Balistidae   | <i>Balistoides viridescens</i>        | NE | 1 | 0 | 1 | 0 |
| Actinpterygii | Tetradontiformes | Balistidae   | <i>Melichthys indicus</i>             | NE | 0 | 0 | 1 | 0 |
| Actinpterygii | Tetradontiformes | Balistidae   | <i>Melichthys niger</i>               | LC | 0 | 0 | 1 | 0 |
| Actinpterygii | Tetradontiformes | Balistidae   | <i>Odonus niger</i>                   | NE | 1 | 0 | 1 | 0 |
| Actinpterygii | Tetradontiformes | Balistidae   | <i>Pseudobalistes flavimarginatus</i> | NE | 1 | 0 | 1 | 0 |
| Actinpterygii | Tetradontiformes | Balistidae   | <i>Pseudobalistes fuscus</i>          | NE | 1 | 0 | 1 | 0 |
| Actinpterygii | Tetradontiformes | Balistidae   | <i>Rhinecanthus aculeatus</i>         | NE | 1 | 0 | 1 | 0 |
| Actinpterygii | Tetradontiformes | Balistidae   | <i>Rhinecanthus rectangulus</i>       | NE | 0 | 0 | 1 | 0 |
| Actinpterygii | Tetradontiformes | Balistidae   | <i>Sufflamen bursa</i>                | NE | 0 | 0 | 1 | 0 |
| Actinpterygii | Tetradontiformes | Balistidae   | <i>Sufflamen chrysopteron</i>         | NE | 1 | 0 | 1 | 0 |
| Actinpterygii | Tetradontiformes | Balistidae   | <i>Sufflamen fraenatum</i>            | LC | 1 | 0 | 1 | 0 |
| Actinpterygii | Tetradontiformes | Balistidae   | <i>Xanthichthys caeruleolineatus</i>  | NE | 0 | 0 | 1 | 0 |
| Actinpterygii | Beloniformes     | Belonidae    | <i>Platybelone argalus platyura</i>   | LC | 0 | 0 | 1 | 0 |
| Actinpterygii | Beloniformes     | Belonidae    | <i>Tylosurus crocodilus</i>           | LC | 1 | 1 | 0 | 0 |
| Actinpterygii | Blenniiformes    | Blenniidae   | <i>Aspidontus dussumieri</i>          | LC | 0 | 0 | 1 | 0 |
| Actinpterygii | Blenniiformes    | Blenniidae   | <i>Blenniella chrysospilos</i>        | LC | 0 | 0 | 1 | 0 |

|               |                   |               |                                     |    |   |   |   |   |
|---------------|-------------------|---------------|-------------------------------------|----|---|---|---|---|
| Actinpterygii | Blenniformes      | Blenniidae    | <i>Cirripectes castaneus</i>        | LC | 0 | 0 | 1 | 0 |
| Actinpterygii | Blenniformes      | Blenniidae    | <i>Cirripectes polyzona</i>         | LC | 0 | 0 | 1 | 0 |
| Actinpterygii | Blenniformes      | Blenniidae    | <i>Ecsenius midas</i>               | LC | 0 | 0 | 1 | 0 |
| Actinpterygii | Blenniformes      | Blenniidae    | <i>Ecsenius nalolo</i>              | LC | 0 | 0 | 1 | 0 |
| Actinpterygii | Blenniformes      | Blenniidae    | <i>Exallias brevis</i>              | LC | 0 | 0 | 1 | 0 |
| Actinpterygii | Blenniformes      | Blenniidae    | <i>Petroscirtes mitratus</i>        | LC | 1 | 1 | 1 | 0 |
| Actinpterygii | Blenniformes      | Blenniidae    | <i>Plagiotremus rhinorhynchos</i>   | LC | 1 | 0 | 1 | 0 |
| Actinpterygii | Blenniformes      | Blenniidae    | <i>Plagiotremus tapeinosoma</i>     | LC | 0 | 0 | 1 | 0 |
| Actinpterygii | Blenniformes      | Blenniidae    | <i>Salarias fasciatus</i>           | LC | 0 | 0 | 1 | 0 |
| Actinpterygii | Pleuronectiformes | Bothidae      | <i>Bothus pantherinus</i>           | LC | 0 | 0 | 1 | 0 |
| Actinpterygii | Perciformes       | Caesionidae   | <i>Caesio caeruleaurea</i>          | LC | 1 | 0 | 1 | 0 |
| Actinpterygii | Perciformes       | Caesionidae   | <i>Caesio lunaris</i>               | LC | 1 | 0 | 1 | 0 |
| Actinpterygii | Perciformes       | Caesionidae   | <i>Caesio teres</i>                 | LC | 0 | 1 | 1 | 0 |
| Actinpterygii | Perciformes       | Caesionidae   | <i>Caesio varilineata</i>           | LC | 1 | 0 | 1 | 0 |
| Actinpterygii | Perciformes       | Caesionidae   | <i>Caesio xanthonota</i>            | LC | 1 | 0 | 1 | 0 |
| Actinpterygii | Perciformes       | Caesionidae   | <i>Dipterygonotus balteatus</i>     | LC | 0 | 0 | 1 | 1 |
| Actinpterygii | Perciformes       | Caesionidae   | <i>Pterocaesio marri</i>            | LC | 0 | 0 | 1 | 0 |
| Actinpterygii | Perciformes       | Caesionidae   | <i>Pterocaesio tile</i>             | LC | 1 | 0 | 1 | 0 |
| Actinpterygii | Callionymiformes  | Callionymidae | <i>Callionymus delicatulus</i>      | NE | 0 | 0 | 1 | 0 |
| Actinpterygii | Callionymiformes  | Callionymidae | <i>Synchiropus stellatus</i>        | NE | 0 | 0 | 1 | 0 |
| Actinpterygii | Carangiformes     | Carangidae    | <i>Carangoides coeruleopinnatus</i> | LC | 0 | 1 | 1 | 0 |
| Actinpterygii | Carangiformes     | Carangidae    | <i>Carangoides ferdau</i>           | LC | 0 | 0 | 1 | 0 |
| Actinpterygii | Carangiformes     | Carangidae    | <i>Carangoides fulvoguttatus</i>    | LC | 0 | 1 | 1 | 0 |
| Actinpterygii | Carangiformes     | Carangidae    | <i>Carangoides orthogrammus</i>     | LC | 1 | 0 | 1 | 1 |
| Actinpterygii | Carangiformes     | Carangidae    | <i>Carangoides plagiotaenia</i>     | LC | 1 | 0 | 1 | 0 |
| Actinpterygii | Carangiformes     | Carangidae    | <i>Caranx heberi</i>                | LC | 0 | 0 | 1 | 1 |
| Actinpterygii | Carangiformes     | Carangidae    | <i>Caranx ignobilis</i>             | LC | 0 | 0 | 1 | 1 |
| Actinpterygii | Carangiformes     | Carangidae    | <i>Caranx melampygus</i>            | LC | 1 | 0 | 1 | 1 |
| Actinpterygii | Carangiformes     | Carangidae    | <i>Caranx sexfasciatus</i>          | LC | 0 | 0 | 1 | 1 |
| Actinpterygii | Carangiformes     | Carangidae    | <i>Decapterus macarellus</i>        | LC | 0 | 0 | 1 | 1 |
| Actinpterygii | Carangiformes     | Carangidae    | <i>Elagatis bipinnulata</i>         | LC | 0 | 0 | 1 | 1 |
| Actinpterygii | Carangiformes     | Carangidae    | <i>Gnathanodon speciosus</i>        | LC | 0 | 0 | 1 | 1 |
| Actinpterygii | Carangiformes     | Carangidae    | <i>Scomberoides lysan</i>           | LC | 0 | 0 | 1 | 1 |
| Actinpterygii | Carangiformes     | Carangidae    | <i>Selar crumenophthalmus</i>       | LC | 0 | 0 | 0 | 1 |

|               |                    |                |                                   |    |   |   |   |   |
|---------------|--------------------|----------------|-----------------------------------|----|---|---|---|---|
| Actinpterygii | Carangiformes      | Carangidae     | <i>Seriola dumerili</i>           | LC | 0 | 0 | 1 | 1 |
| Actinpterygii | Carangiformes      | Carangidae     | <i>Siganus luridus</i>            | LC | 0 | 0 | 1 | 0 |
| Actinpterygii | Carangiformes      | Carangidae     | <i>Trachinotus baillonii</i>      | LC | 1 | 0 | 1 | 1 |
| Actinpterygii | Carangiformes      | Carangidae     | <i>Trachinotus blochii</i>        | LC | 0 | 0 | 1 | 0 |
| Actinpterygii | Perciformes        | Chaetodontidae | <i>Chaetodon auriga</i>           | LC | 1 | 0 | 1 | 0 |
| Actinpterygii | Perciformes        | Chaetodontidae | <i>Chaetodon bennetti</i>         | DD | 1 | 0 | 1 | 0 |
| Actinpterygii | Perciformes        | Chaetodontidae | <i>Chaetodon falcula</i>          | LC | 1 | 0 | 1 | 0 |
| Actinpterygii | Perciformes        | Chaetodontidae | <i>Chaetodon guttatissimus</i>    | LC | 1 | 0 | 1 | 0 |
| Actinpterygii | Perciformes        | Chaetodontidae | <i>Chaetodon interruptus</i>      | LC | 1 | 0 | 1 | 0 |
| Actinpterygii | Perciformes        | Chaetodontidae | <i>Chaetodon kleinii</i>          | LC | 1 | 0 | 1 | 0 |
| Actinpterygii | Perciformes        | Chaetodontidae | <i>Chaetodon lineolatus</i>       | LC | 1 | 0 | 1 | 0 |
| Actinpterygii | Perciformes        | Chaetodontidae | <i>Chaetodon lunula</i>           | LC | 1 | 0 | 1 | 0 |
| Actinpterygii | Perciformes        | Chaetodontidae | <i>Chaetodon madagaskariensis</i> | LC | 1 | 0 | 1 | 0 |
| Actinpterygii | Perciformes        | Chaetodontidae | <i>Chaetodon melanotus</i>        | LC | 1 | 0 | 1 | 0 |
| Actinpterygii | Perciformes        | Chaetodontidae | <i>Chaetodon meyeri</i>           | LC | 1 | 0 | 1 | 0 |
| Actinpterygii | Perciformes        | Chaetodontidae | <i>Chaetodon trifascialis</i>     | NT | 0 | 1 | 1 | 0 |
| Actinpterygii | Perciformes        | Chaetodontidae | <i>Chaetodon trifasciatus</i>     | LC | 1 | 0 | 1 | 0 |
| Actinpterygii | Perciformes        | Chaetodontidae | <i>Chaetodon xanthocephalus</i>   | LC | 1 | 0 | 1 | 0 |
| Actinpterygii | Perciformes        | Chaetodontidae | <i>Chaetodon zanzibarensis</i>    | LC | 1 | 0 | 1 | 0 |
| Actinpterygii | Perciformes        | Chaetodontidae | <i>Forcipiger flavissimus</i>     | LC | 1 | 0 | 1 | 0 |
| Actinpterygii | Perciformes        | Chaetodontidae | <i>Forcipiger longirostris</i>    | LC | 1 | 0 | 1 | 0 |
| Actinpterygii | Perciformes        | Chaetodontidae | <i>Hemitaenichthys zoster</i>     | LC | 0 | 0 | 1 | 0 |
| Actinpterygii | Perciformes        | Chaetodontidae | <i>Heniochus diphreutes</i>       | LC | 1 | 0 | 1 | 0 |
| Actinpterygii | Perciformes        | Chaetodontidae | <i>Heniochus monoceros</i>        | LC | 1 | 0 | 1 | 0 |
| Actinpterygii | Gonorrhynchiformes | Chanidae       | <i>Chanos chanos</i>              | LC | 0 | 0 | 1 | 1 |
| Actinpterygii | Perciformes        | Cirrhitidae    | <i>Amblycirrhitus bimacula</i>    | LC | 0 | 0 | 1 | 0 |
| Actinpterygii | Perciformes        | Cirrhitidae    | <i>Cirrhitichthys oxycephalus</i> | LC | 1 | 0 | 1 | 0 |
| Actinpterygii | Perciformes        | Cirrhitidae    | <i>Cirrhitus pinnulatus</i>       | LC | 0 | 0 | 1 | 0 |
| Actinpterygii | Perciformes        | Cirrhitidae    | <i>Oxycirrhitus typus</i>         | LC | 0 | 0 | 1 | 0 |
| Actinpterygii | Perciformes        | Cirrhitidae    | <i>Paracirrhitus arcatus</i>      | LC | 1 | 0 | 1 | 0 |
| Actinpterygii | Perciformes        | Cirrhitidae    | <i>Paracirrhitus forsteri</i>     | LC | 1 | 0 | 1 | 0 |
| Actinpterygii | Clupeiformes       | Clupeidae      | <i>Spratelloides delicatulus</i>  | LC | 0 | 0 | 0 | 1 |
| Actinpterygii | Anguilliformes     | Congridae      | <i>Gorgasia maculata</i>          | LC | 0 | 0 | 1 | 0 |
| Actinpterygii | Anguilliformes     | Congridae      | <i>Heteroconger hassi</i>         | LC | 1 | 0 | 0 | 0 |

|               |                  |               |                                    |    |   |   |   |   |
|---------------|------------------|---------------|------------------------------------|----|---|---|---|---|
| Actinpterygii | Tetradontiformes | Diodontidae   | <i>Diodon liturosus</i>            | NE | 0 | 0 | 1 | 0 |
| Actinpterygii | Carangiformes    | Echeneidae    | <i>Echeneis naucrates</i>          | LC | 1 | 0 | 1 | 1 |
| Actinpterygii | Carangiformes    | Echeneidae    | <i>Remorina albescens</i>          | LC | 0 | 0 | 1 | 1 |
| Actinpterygii | Acanthuriformes  | Ephippidae    | <i>Platax orbicularis</i>          | LC | 0 | 0 | 1 | 0 |
| Actinpterygii | Acanthuriformes  | Ephippidae    | <i>Platax teira</i>                | LC | 1 | 0 | 1 | 0 |
| Actinpterygii | Beloniformes     | Exocoetidae   | <i>Cypselurus poecilopterus</i>    | NE | 0 | 0 | 0 | 0 |
| Actinpterygii | Syngnathiformes  | Fistulariidae | <i>Fistularia commersonii</i>      | LC | 1 | 0 | 1 | 0 |
| Actinpterygii | Perciformes      | Gerreidae     | <i>Gerres longirostris</i>         | LC | 0 | 0 | 1 | 0 |
| Actinpterygii | Perciformes      | Gerreidae     | <i>Gerres oyena</i>                | LC | 0 | 0 | 1 | 0 |
| Actinpterygii | Gobiiformes      | Gobiidae      | <i>Acentrogobius nebulosus</i>     | LC | 1 | 0 | 1 | 0 |
| Actinpterygii | Gobiiformes      | Gobiidae      | <i>Amblyeleotris aurora</i>        | LC | 1 | 0 | 1 | 0 |
| Actinpterygii | Gobiiformes      | Gobiidae      | <i>Amblyeleotris periophthalma</i> | LC | 1 | 0 | 1 | 0 |
| Actinpterygii | Gobiiformes      | Gobiidae      | <i>Amblyeleotris sungami</i>       | LC | 1 | 0 | 1 | 0 |
| Actinpterygii | Gobiiformes      | Gobiidae      | <i>Amblygobius nocturnus</i>       | LC | 0 | 0 | 1 | 0 |
| Actinpterygii | Gobiiformes      | Gobiidae      | <i>Amblygobius semicinctus</i>     | LC | 0 | 0 | 1 | 0 |
| Actinpterygii | Gobiiformes      | Gobiidae      | <i>Asterropteryx semipunctatus</i> | LC | 1 | 1 | 1 | 0 |
| Actinpterygii | Gobiiformes      | Gobiidae      | <i>Bryaninops amplus</i>           | LC | 0 | 0 | 1 | 0 |
| Actinpterygii | Gobiiformes      | Gobiidae      | <i>Bryaninops sp.</i>              | NE | 0 | 0 | 0 | 0 |
| Actinpterygii | Gobiiformes      | Gobiidae      | <i>Bryaninops yongei</i>           | LC | 0 | 0 | 1 | 0 |
| Actinpterygii | Gobiiformes      | Gobiidae      | <i>Cryptocentrus cryptocentrus</i> | LC | 1 | 1 | 1 | 0 |
| Actinpterygii | Gobiiformes      | Gobiidae      | <i>Cryptocentrus fasciatus</i>     | LC | 1 | 0 | 1 | 0 |
| Actinpterygii | Gobiiformes      | Gobiidae      | <i>Ctenogobiops crocineus</i>      | LC | 0 | 0 | 1 | 0 |
| Actinpterygii | Gobiiformes      | Gobiidae      | <i>Ctenogobiops feroculus</i>      | LC | 1 | 0 | 1 | 0 |
| Actinpterygii | Gobiiformes      | Gobiidae      | <i>Eviota cf. mikiae</i>           | LC | 0 | 0 | 1 | 0 |
| Actinpterygii | Gobiiformes      | Gobiidae      | <i>Eviota cf. nigriventris</i>     | DD | 0 | 0 | 1 | 0 |
| Actinpterygii | Gobiiformes      | Gobiidae      | <i>Eviota dalyi</i>                | NE | 0 | 0 | 1 | 0 |
| Actinpterygii | Gobiiformes      | Gobiidae      | <i>Eviota guttata</i>              | LC | 0 | 0 | 1 | 0 |
| Actinpterygii | Gobiiformes      | Gobiidae      | <i>Eviota prasina</i>              | LC | 0 | 0 | 1 | 0 |
| Actinpterygii | Gobiiformes      | Gobiidae      | <i>Eviota sebreei</i>              | LC | 0 | 0 | 1 | 0 |
| Actinpterygii | Gobiiformes      | Gobiidae      | <i>Fusigobius duospilus</i>        | LC | 0 | 0 | 1 | 0 |
| Actinpterygii | Gobiiformes      | Gobiidae      | <i>Fusigobius inframaculatus</i>   | LC | 0 | 0 | 1 | 0 |
| Actinpterygii | Gobiiformes      | Gobiidae      | <i>Fusigobius neophytus</i>        | LC | 1 | 0 | 1 | 0 |
| Actinpterygii | Gobiiformes      | Gobiidae      | <i>Fusigobius pallidus</i>         | LC | 1 | 0 | 1 | 0 |
| Actinpterygii | Gobiiformes      | Gobiidae      | <i>Gnatholepis anjerensis</i>      | LC | 0 | 0 | 1 | 1 |

|               |                  |               |                                           |    |   |   |   |   |
|---------------|------------------|---------------|-------------------------------------------|----|---|---|---|---|
| Actinpterygii | Gobiiformes      | Gobiidae      | <i>Gnatholepis cauerensis</i>             | LC | 0 | 0 | 1 | 0 |
| Actinpterygii | Gobiiformes      | Gobiidae      | <i>Gobiodon bilineatus</i>                | LC | 0 | 0 | 1 | 0 |
| Actinpterygii | Gobiiformes      | Gobiidae      | <i>Gobiodon citrinus</i>                  | LC | 0 | 0 | 1 | 0 |
| Actinpterygii | Gobiiformes      | Gobiidae      | <i>Gobiodon prolixus</i>                  | LC | 0 | 0 | 1 | 0 |
| Actinpterygii | Gobiiformes      | Gobiidae      | <i>Gobiodon rivulatus</i>                 | LC | 1 | 0 | 1 | 0 |
| Actinpterygii | Gobiiformes      | Gobiidae      | <i>Istigobius decoratus</i>               | LC | 0 | 0 | 1 | 0 |
| Actinpterygii | Gobiiformes      | Gobiidae      | <i>Koumansetta hectori</i>                | LC | 0 | 0 | 1 | 0 |
| Actinpterygii | Gobiiformes      | Gobiidae      | <i>Macrodontogobius wilburi</i>           | LC | 1 | 0 | 1 | 0 |
| Actinpterygii | Gobiiformes      | Gobiidae      | <i>Oplopomus caninoides</i>               | NE | 0 | 0 | 0 | 0 |
| Actinpterygii | Gobiiformes      | Gobiidae      | <i>Oplopomus oplopomus</i>                | LC | 1 | 0 | 1 | 0 |
| Actinpterygii | Gobiiformes      | Gobiidae      | <i>Periophthalmus cf. argentilineatus</i> | LC | 1 | 1 | 0 | 0 |
| Actinpterygii | Gobiiformes      | Gobiidae      | <i>Pleurosicya micheli</i>                | LC | 0 | 0 | 1 | 0 |
| Actinpterygii | Gobiiformes      | Gobiidae      | <i>Pleurosicya mossambica</i>             | LC | 0 | 0 | 1 | 0 |
| Actinpterygii | Gobiiformes      | Gobiidae      | <i>Priolepis cincta</i>                   | LC | 0 | 0 | 1 | 0 |
| Actinpterygii | Gobiiformes      | Gobiidae      | <i>Stonogobiops dracula</i>               | LC | 0 | 0 | 1 | 0 |
| Actinpterygii | Gobiiformes      | Gobiidae      | <i>Trimma anaima</i>                      | LC | 1 | 0 | 1 | 0 |
| Actinpterygii | Gobiiformes      | Gobiidae      | <i>Trimma cf. winchi</i>                  | NE | 0 | 0 | 1 | 0 |
| Actinpterygii | Gobiiformes      | Gobiidae      | <i>Trimma haima</i>                       | LC | 1 | 0 | 1 | 0 |
| Actinpterygii | Gobiiformes      | Gobiidae      | <i>Trimma macrophthalmum</i>              | LC | 0 | 0 | 1 | 0 |
| Actinpterygii | Gobiiformes      | Gobiidae      | <i>Valenciennea helsdingeni</i>           | LC | 1 | 0 | 1 | 0 |
| Actinpterygii | Gobiiformes      | Gobiidae      | <i>Valenciennea puellaris</i>             | LC | 1 | 0 | 1 | 0 |
| Actinpterygii | Gobiiformes      | Gobiidae      | <i>Valenciennea sexguttata</i>            | LC | 1 | 0 | 1 | 0 |
| Actinpterygii | Gobiiformes      | Gobiidae      | <i>Valenciennea strigata</i>              | LC | 1 | 0 | 1 | 0 |
| Actinpterygii | Gobiiformes      | Gobiidae      | <i>Vanderhorstia ambanoro</i>             | LC | 1 | 1 | 1 | 0 |
| Actinpterygii | Gobiiformes      | Gobiidae      | <i>Vanderhorstia delagoae</i>             | LC | 1 | 1 | 1 | 0 |
| Actinpterygii | Gobiiformes      | Gobiidae      | <i>Vanderhorstia sp. ??</i>               | NE | 0 | 0 | 0 | 0 |
| Actinpterygii | Perciformes      | Haemulidae    | <i>Plectorhinchus albovittatus</i>        | NE | 1 | 0 | 1 | 0 |
| Actinpterygii | Perciformes      | Haemulidae    | <i>Plectorhinchus sordidus</i>            | LC | 0 | 1 | 1 | 0 |
| Actinpterygii | Perciformes      | Haemulidae    | <i>Plectorhinchus vittatus</i>            | LC | 1 | 0 | 1 | 0 |
| Actinpterygii | Beloniformes     | Hemiramphidae | <i>Euleptorhamphus viridis</i>            | NE | 0 | 0 | 0 | 0 |
| Actinpterygii | Holocentriformes | Holocentridae | <i>Myripristis adusta</i>                 | LC | 0 | 1 | 1 | 0 |
| Actinpterygii | Holocentriformes | Holocentridae | <i>Myripristis berndti</i>                | LC | 0 | 1 | 1 | 0 |
| Actinpterygii | Holocentriformes | Holocentridae | <i>Myripristis botche</i>                 | LC | 0 | 1 | 1 | 0 |
| Actinpterygii | Holocentriformes | Holocentridae | <i>Myripristis kuntze</i>                 | LC | 0 | 1 | 1 | 0 |

|               |                  |               |                                        |    |   |   |   |   |
|---------------|------------------|---------------|----------------------------------------|----|---|---|---|---|
| Actinpterygii | Holocentriformes | Holocentridae | <i>Myripristis murdjan</i>             | LC | 0 | 1 | 1 | 0 |
| Actinpterygii | Holocentriformes | Holocentridae | <i>Myripristis pralinia</i>            | LC | 0 | 1 | 1 | 0 |
| Actinpterygii | Holocentriformes | Holocentridae | <i>Myripristis violacea</i>            | LC | 0 | 1 | 1 | 0 |
| Actinpterygii | Holocentriformes | Holocentridae | <i>Myripristis vittata</i>             | LC | 0 | 1 | 1 | 0 |
| Actinpterygii | Holocentriformes | Holocentridae | <i>Neoniphon argenteus</i>             | LC | 0 | 1 | 1 | 0 |
| Actinpterygii | Holocentriformes | Holocentridae | <i>Neoniphon opercularis</i>           | LC | 0 | 1 | 1 | 0 |
| Actinpterygii | Holocentriformes | Holocentridae | <i>Neoniphon sammara</i>               | LC | 0 | 1 | 1 | 0 |
| Actinpterygii | Holocentriformes | Holocentridae | <i>Sargocentron caudimaculatum</i>     | LC | 0 | 1 | 1 | 0 |
| Actinpterygii | Holocentriformes | Holocentridae | <i>Sargocentron diadema</i>            | LC | 0 | 1 | 1 | 0 |
| Actinpterygii | Holocentriformes | Holocentridae | <i>Sargocentron microstoma</i>         | LC | 0 | 1 | 1 | 0 |
| Actinpterygii | Holocentriformes | Holocentridae | <i>Sargocentron punctatissimum</i>     | LC | 0 | 1 | 1 | 0 |
| Actinpterygii | Holocentriformes | Holocentridae | <i>Sargocentron seychellense</i>       | NE | 0 | 1 | 1 | 0 |
| Actinpterygii | Holocentriformes | Holocentridae | <i>Sargocentron spiniferum</i>         | LC | 0 | 1 | 1 | 0 |
| Actinpterygii | Istiophoriformes | Istiophoridae | <i>Coryphaena hippurus</i>             | LC | 0 | 0 | 0 | 1 |
| Actinpterygii | Istiophoriformes | Istiophoridae | <i>Istiophorus platypterus</i>         | LC | 0 | 0 | 0 | 1 |
| Actinpterygii | Perciformes      | Kuhliidae     | <i>Kuhlia mugil</i>                    | LC | 0 | 0 | 1 | 0 |
| Actinpterygii | Perciformes      | Kyphosidae    | <i>Kyphosus cinerascens</i>            | LC | 0 | 0 | 1 | 0 |
| Actinpterygii | Perciformes      | Kyphosidae    | <i>Kyphosus vaigiensis</i>             | LC | 0 | 0 | 1 | 0 |
| Actinpterygii | Labriformes      | Labridae      | <i>Anampses caeruleopunctatus</i>      | LC | 1 | 1 | 1 | 0 |
| Actinpterygii | Labriformes      | Labridae      | <i>Anampses lineatus</i>               | DD | 1 | 0 | 1 | 0 |
| Actinpterygii | Labriformes      | Labridae      | <i>Anampses meleagrides</i>            | LC | 0 | 0 | 1 | 0 |
| Actinpterygii | Labriformes      | Labridae      | <i>Bodianus anthioides</i>             | LC | 0 | 0 | 1 | 0 |
| Actinpterygii | Labriformes      | Labridae      | <i>Bodianus axillaris</i>              | LC | 0 | 0 | 1 | 0 |
| Actinpterygii | Labriformes      | Labridae      | <i>Bodianus bilunulatus</i>            | LC | 0 | 0 | 1 | 0 |
| Actinpterygii | Labriformes      | Labridae      | <i>Bodianus diana</i>                  | LC | 0 | 0 | 1 | 0 |
| Actinpterygii | Labriformes      | Labridae      | <i>Cheilinus chlorourus</i>            | LC | 1 | 1 | 1 | 0 |
| Actinpterygii | Labriformes      | Labridae      | <i>Cheilinus lunulatus</i>             | LC | 0 | 1 | 1 | 0 |
| Actinpterygii | Labriformes      | Labridae      | <i>Cheilinus oxycephalus</i>           | LC | 0 | 0 | 1 | 0 |
| Actinpterygii | Labriformes      | Labridae      | <i>Cheilinus trilobatus</i>            | LC | 1 | 1 | 1 | 0 |
| Actinpterygii | Labriformes      | Labridae      | <i>Cheilinus undulatus</i>             | EN | 1 | 1 | 1 | 0 |
| Actinpterygii | Labriformes      | Labridae      | <i>Cheilio inermis</i>                 | LC | 0 | 1 | 1 | 0 |
| Actinpterygii | Labriformes      | Labridae      | <i>Cirrhilabrus cf. rubriventralis</i> | LC | 0 | 0 | 1 | 0 |
| Actinpterygii | Labriformes      | Labridae      | <i>Cirrhilabrus exquiritus</i>         | DD | 0 | 0 | 1 | 0 |
| Actinpterygii | Labriformes      | Labridae      | <i>Coris aygula</i>                    | LC | 0 | 0 | 1 | 0 |

|               |             |          |                                      |    |   |   |   |   |
|---------------|-------------|----------|--------------------------------------|----|---|---|---|---|
| Actinpterygii | Labriformes | Labridae | <i>Coris caudimacula</i>             | LC | 1 | 0 | 1 | 0 |
| Actinpterygii | Labriformes | Labridae | <i>Coris cuvieri</i>                 | LC | 1 | 0 | 1 | 0 |
| Actinpterygii | Labriformes | Labridae | <i>Coris formosa</i>                 | LC | 0 | 0 | 1 | 0 |
| Actinpterygii | Labriformes | Labridae | <i>Epibulus insidiator</i>           | LC | 0 | 0 | 1 | 0 |
| Actinpterygii | Labriformes | Labridae | <i>Gomphosus caeruleus</i>           | LC | 1 | 0 | 1 | 0 |
| Actinpterygii | Labriformes | Labridae | <i>Halichoeres cosmetus</i>          | LC | 0 | 0 | 1 | 0 |
| Actinpterygii | Labriformes | Labridae | <i>Halichoeres hortulanus</i>        | LC | 0 | 0 | 1 | 0 |
| Actinpterygii | Labriformes | Labridae | <i>Halichoeres iridis</i>            | LC | 0 | 0 | 1 | 0 |
| Actinpterygii | Labriformes | Labridae | <i>Halichoeres marginatus</i>        | LC | 0 | 0 | 1 | 0 |
| Actinpterygii | Labriformes | Labridae | <i>Halichoeres nebulosus</i>         | LC | 1 | 1 | 1 | 0 |
| Actinpterygii | Labriformes | Labridae | <i>Halichoeres scapularis</i>        | LC | 1 | 1 | 1 | 0 |
| Actinpterygii | Labriformes | Labridae | <i>Halichoeres trispilus</i>         | LC | 1 | 0 | 1 | 0 |
| Actinpterygii | Labriformes | Labridae | <i>Halichoeres zeylonicus</i>        | LC | 0 | 0 | 1 | 0 |
| Actinpterygii | Labriformes | Labridae | <i>Hemigymnus fasciatus</i>          | LC | 0 | 0 | 1 | 0 |
| Actinpterygii | Labriformes | Labridae | <i>Hemigymnus melapterus</i>         | LC | 1 | 1 | 1 | 0 |
| Actinpterygii | Labriformes | Labridae | <i>Hologymnosus annulatus</i>        | LC | 1 | 0 | 1 | 0 |
| Actinpterygii | Labriformes | Labridae | <i>Hologymnosus doliatus</i>         | LC | 0 | 0 | 1 | 0 |
| Actinpterygii | Labriformes | Labridae | <i>Iniistius naevus</i>              | NE | 1 | 1 | 1 | 0 |
| Actinpterygii | Labriformes | Labridae | <i>Iniistius pavo</i>                | LC | 1 | 0 | 1 | 0 |
| Actinpterygii | Labriformes | Labridae | <i>Iniistius sp.</i>                 | NE | 1 | 1 | 1 | 0 |
| Actinpterygii | Labriformes | Labridae | <i>Labrichthys unilineatus</i>       | LC | 1 | 0 | 1 | 0 |
| Actinpterygii | Labriformes | Labridae | <i>Labroides bicolor</i>             | LC | 0 | 0 | 1 | 0 |
| Actinpterygii | Labriformes | Labridae | <i>Labroides dimidiatus</i>          | LC | 0 | 0 | 1 | 0 |
| Actinpterygii | Labriformes | Labridae | <i>Labropsis xanthonota</i>          | LC | 0 | 0 | 1 | 0 |
| Actinpterygii | Labriformes | Labridae | <i>Macropharyngodon bipartitus</i>   | LC | 1 | 0 | 1 | 0 |
| Actinpterygii | Labriformes | Labridae | <i>Novaculichthys macrolepidotus</i> | LC | 1 | 1 | 0 | 0 |
| Actinpterygii | Labriformes | Labridae | <i>Novaculichthys taeniourus</i>     | LC | 0 | 0 | 1 | 0 |
| Actinpterygii | Labriformes | Labridae | <i>Oxycheilinus bimaculatus</i>      | LC | 1 | 1 | 1 | 0 |
| Actinpterygii | Labriformes | Labridae | <i>Oxycheilinus digramma</i>         | LC | 1 | 1 | 1 | 0 |
| Actinpterygii | Labriformes | Labridae | <i>Oxycheilinus orientalis</i>       | LC | 1 | 1 | 1 | 0 |
| Actinpterygii | Labriformes | Labridae | <i>Paracheilinus attenuatus</i>      | LC | 0 | 0 | 1 | 0 |
| Actinpterygii | Labriformes | Labridae | <i>Pseudocheilinus evanidus</i>      | LC | 0 | 0 | 1 | 0 |
| Actinpterygii | Labriformes | Labridae | <i>Pseudocheilinus hexataenia</i>    | LC | 0 | 0 | 1 | 0 |
| Actinpterygii | Labriformes | Labridae | <i>Pseudocheilinus octotaenia</i>    | LC | 0 | 0 | 1 | 0 |



|               |             |             |                                     |    |   |   |   |   |
|---------------|-------------|-------------|-------------------------------------|----|---|---|---|---|
| Actinpterygii | Labriformes | Labridae    | <i>Pseudocoris heteroptera</i>      | LC | 0 | 0 | 1 | 0 |
| Actinpterygii | Labriformes | Labridae    | <i>Pseudocoris petila</i>           | NE | 0 | 0 | 1 | 0 |
| Actinpterygii | Labriformes | Labridae    | <i>Pseudodax moluccanus</i>         | LC | 0 | 0 | 1 | 0 |
| Actinpterygii | Labriformes | Labridae    | <i>Pseudojuloides argyreogaster</i> | LC | 0 | 1 | 1 | 0 |
| Actinpterygii | Labriformes | Labridae    | <i>Pseudojuloides cf. erythrops</i> | LC | 0 | 0 | 1 | 0 |
| Actinpterygii | Labriformes | Labridae    | <i>Pteragogus cf. variabilis</i>    | NE | 1 | 1 | 1 | 0 |
| Actinpterygii | Labriformes | Labridae    | <i>Stethojulis albobittata</i>      | LC | 1 | 1 | 1 | 0 |
| Actinpterygii | Labriformes | Labridae    | <i>Stethojulis strigiventer</i>     | LC | 1 | 1 | 1 | 0 |
| Actinpterygii | Labriformes | Labridae    | <i>Thalassoma amblycephalum</i>     | LC | 1 | 0 | 1 | 0 |
| Actinpterygii | Labriformes | Labridae    | <i>Thalassoma hardwicke</i>         | LC | 1 | 1 | 1 | 0 |
| Actinpterygii | Labriformes | Labridae    | <i>Thalassoma hebraicum</i>         | LC | 1 | 0 | 1 | 0 |
| Actinpterygii | Labriformes | Labridae    | <i>Thalassoma lunare</i>            | LC | 1 | 1 | 1 | 0 |
| Actinpterygii | Labriformes | Labridae    | <i>Thalassoma purpureum</i>         | LC | 0 | 0 | 1 | 0 |
| Actinpterygii | Labriformes | Labridae    | <i>Thalassoma quinquevittatum</i>   | LC | 0 | 0 | 1 | 0 |
| Actinpterygii | Labriformes | Labridae    | <i>Wetmorella albofasciata</i>      | LC | 0 | 0 | 1 | 0 |
| Actinpterygii | Labriformes | Labridae    | <i>Wetmorella nigropinnata</i>      | LC | 0 | 0 | 1 | 0 |
| Actinpterygii | Perciformes | Lethrinidae | <i>Gnathodentex aureolineatus</i>   | LC | 1 | 0 | 1 | 0 |
| Actinpterygii | Perciformes | Lethrinidae | <i>Gymnocranius grandoculis</i>     | LC | 0 | 0 | 1 | 0 |
| Actinpterygii | Perciformes | Lethrinidae | <i>Lethrinus cf. crocineus</i>      | LC | 0 | 0 | 1 | 0 |
| Actinpterygii | Perciformes | Lethrinidae | <i>Lethrinus enigmaticus</i>        | LC | 1 | 1 | 1 | 0 |
| Actinpterygii | Perciformes | Lethrinidae | <i>Lethrinus erythracanthus</i>     | LC | 0 | 0 | 1 | 0 |
| Actinpterygii | Perciformes | Lethrinidae | <i>Lethrinus harak</i>              | LC | 1 | 1 | 1 | 0 |
| Actinpterygii | Perciformes | Lethrinidae | <i>Lethrinus lentjan</i>            | LC | 0 | 0 | 1 | 0 |
| Actinpterygii | Perciformes | Lethrinidae | <i>Lethrinus nebulosus</i>          | LC | 1 | 1 | 1 | 0 |
| Actinpterygii | Perciformes | Lethrinidae | <i>Lethrinus obsoletus</i>          | LC | 1 | 1 | 1 | 0 |
| Actinpterygii | Perciformes | Lethrinidae | <i>Lethrinus olivaceus</i>          | LC | 0 | 0 | 1 | 0 |
| Actinpterygii | Perciformes | Lethrinidae | <i>Lethrinus rubrioperculatus</i>   | LC | 0 | 0 | 1 | 0 |
| Actinpterygii | Perciformes | Lethrinidae | <i>Lethrinus xanthochilus</i>       | LC | 1 | 1 | 1 | 0 |
| Actinpterygii | Perciformes | Lethrinidae | <i>Monotaxis grandoculis</i>        | LC | 0 | 0 | 1 | 0 |
| Actinpterygii | Perciformes | Lethrinidae | <i>Monotaxis heterodon</i>          | LC | 0 | 0 | 1 | 0 |
| Actinpterygii | Perciformes | Lutjanidae  | <i>Aphareus furca</i>               | LC | 1 | 0 | 1 | 0 |
| Actinpterygii | Perciformes | Lutjanidae  | <i>Aprion virescens</i>             | LC | 1 | 0 | 1 | 0 |
| Actinpterygii | Perciformes | Lutjanidae  | <i>Lutjanus argentimaculatus</i>    | LC | 0 | 0 | 1 | 0 |
| Actinpterygii | Perciformes | Lutjanidae  | <i>Lutjanus bengalensis</i>         | LC | 0 | 0 | 1 | 0 |

|               |                  |                |                                     |    |   |   |   |   |
|---------------|------------------|----------------|-------------------------------------|----|---|---|---|---|
| Actinpterygii | Perciformes      | Lutjanidae     | <i>Lutjanus bohar</i>               | LC | 1 | 0 | 1 | 0 |
| Actinpterygii | Perciformes      | Lutjanidae     | <i>Lutjanus ehrenbergii</i>         | LC | 0 | 0 | 1 | 0 |
| Actinpterygii | Perciformes      | Lutjanidae     | <i>Lutjanus fulviflamma</i>         | LC | 1 | 0 | 1 | 0 |
| Actinpterygii | Perciformes      | Lutjanidae     | <i>Lutjanus fulvus</i>              | LC | 1 | 0 | 1 | 0 |
| Actinpterygii | Perciformes      | Lutjanidae     | <i>Lutjanus gibbus</i>              | LC | 0 | 1 | 1 | 0 |
| Actinpterygii | Perciformes      | Lutjanidae     | <i>Lutjanus kasmira</i>             | LC | 1 | 1 | 1 | 0 |
| Actinpterygii | Perciformes      | Lutjanidae     | <i>Lutjanus monostigma</i>          | LC | 0 | 0 | 1 | 0 |
| Actinpterygii | Perciformes      | Lutjanidae     | <i>Macolor niger</i>                | LC | 1 | 0 | 1 | 0 |
| Actinpterygii | Perciformes      | Malacanthidae  | <i>Malacanthus brevirostris</i>     | NE | 0 | 0 | 1 | 1 |
| Actinpterygii | Perciformes      | Malacanthidae  | <i>Malacanthus latovittatus</i>     | NE | 0 | 0 | 1 | 0 |
| Actinpterygii | Gobiiformes      | Microdesmidae  | <i>Gunnellichthys curiosus</i>      | LC | 0 | 0 | 1 | 0 |
| Actinpterygii | Gobiiformes      | Microdesmidae  | <i>Gunnellichthys monostigma</i>    | LC | 1 | 0 | 0 | 0 |
| Actinpterygii | Gobiiformes      | Microdesmidae  | <i>Gunnellichthys viridescens</i>   | LC | 0 | 1 | 0 | 0 |
| Actinpterygii | Gobiiformes      | Microdesmidae  | <i>Nemateleotris magnifica</i>      | LC | 0 | 0 | 1 | 0 |
| Actinpterygii | Gobiiformes      | Microdesmidae  | <i>Ptereleotris evides</i>          | LC | 1 | 0 | 1 | 0 |
| Actinpterygii | Gobiiformes      | Microdesmidae  | <i>Ptereleotris heteroptera</i>     | LC | 1 | 0 | 1 | 0 |
| Actinpterygii | Gobiiformes      | Microdesmidae  | <i>Ptereleotris microlepis</i>      | LC | 1 | 0 | 1 | 0 |
| Actinpterygii | Gobiiformes      | Microdesmidae  | <i>Ptereleotris monoptera</i>       | LC | 0 | 0 | 1 | 0 |
| Actinpterygii | Gobiiformes      | Microdesmidae  | <i>Ptereleotris zebra</i>           | LC | 0 | 0 | 1 | 0 |
| Actinpterygii | Tetradontiformes | Monacanthidae  | <i>Acreichthys tomentosus</i>       | LC | 0 | 1 | 1 | 0 |
| Actinpterygii | Tetradontiformes | Monacanthidae  | <i>Amanes scopas</i>                | LC | 0 | 0 | 1 | 0 |
| Actinpterygii | Tetradontiformes | Monacanthidae  | <i>Cantherhines pardalis</i>        | LC | 0 | 0 | 1 | 0 |
| Actinpterygii | Tetradontiformes | Monacanthidae  | <i>Paraluteres prionurus</i>        | LC | 0 | 0 | 1 | 0 |
| Actinpterygii | Tetradontiformes | Monacanthidae  | <i>Pervagor janthinosoma</i>        | LC | 0 | 0 | 1 | 0 |
| Actinpterygii | Perciformes      | Monodactylidae | <i>Monodactylus argenteus</i>       | LC | 0 | 0 | 1 | 0 |
| Actinpterygii | Mugiliformes     | Mugilidae      | <i>Crenimugil crenilabis</i>        | LC | 1 | 1 | 1 | 0 |
| Actinpterygii | Mugiliformes     | Mugilidae      | <i>Oedalechilus labiosus</i>        | NE | 1 | 0 | 0 | 0 |
| Actinpterygii | Mugiliformes     | Mugilidae      | <i>Planiliza macrolepis</i>         | LC | 1 | 0 | 0 | 0 |
| Actinpterygii | Perciformes      | Mullidae       | <i>Mulloidichthys flavolineatus</i> | LC | 0 | 0 | 1 | 0 |
| Actinpterygii | Perciformes      | Mullidae       | <i>Mulloidichthys mimicus</i>       | LC | 0 | 0 | 1 | 0 |
| Actinpterygii | Perciformes      | Mullidae       | <i>Mulloidichthys vanicolensis</i>  | LC | 0 | 1 | 1 | 0 |
| Actinpterygii | Perciformes      | Mullidae       | <i>Parupeneus barberinus</i>        | LC | 0 | 1 | 1 | 0 |
| Actinpterygii | Perciformes      | Mullidae       | <i>Parupeneus ciliatus</i>          | LC | 0 | 1 | 1 | 0 |
| Actinpterygii | Perciformes      | Mullidae       | <i>Parupeneus cyclostomus</i>       | LC | 1 | 0 | 1 | 0 |

|               |                  |               |                                    |    |   |   |   |   |
|---------------|------------------|---------------|------------------------------------|----|---|---|---|---|
| Actinpterygii | Perciformes      | Mullidae      | <i>Parupeneus indicus</i>          | LC | 0 | 1 | 1 | 0 |
| Actinpterygii | Perciformes      | Mullidae      | <i>Parupeneus macronemus</i>       | LC | 0 | 1 | 1 | 0 |
| Actinpterygii | Perciformes      | Mullidae      | <i>Parupeneus pleurostigma</i>     | LC | 1 | 1 | 1 | 0 |
| Actinpterygii | Perciformes      | Mullidae      | <i>Parupeneus trifasciatus</i>     | LC | 0 | 0 | 1 | 0 |
| Actinpterygii | Perciformes      | Mullidae      | <i>Upeneus taeniopterus</i>        | LC | 0 | 0 | 1 | 0 |
| Actinpterygii | Anguilliformes   | Muraenidae    | <i>Echidna nebulosa</i>            | LC | 0 | 0 | 1 | 0 |
| Actinpterygii | Anguilliformes   | Muraenidae    | <i>Gymnothorax breedeni</i>        | LC | 0 | 0 | 1 | 0 |
| Actinpterygii | Anguilliformes   | Muraenidae    | <i>Gymnothorax flavimarginatus</i> | LC | 0 | 0 | 1 | 0 |
| Actinpterygii | Anguilliformes   | Muraenidae    | <i>Gymnothorax griseus</i>         | LC | 0 | 0 | 1 | 0 |
| Actinpterygii | Anguilliformes   | Muraenidae    | <i>Gymnothorax javanicus</i>       | LC | 0 | 0 | 1 | 0 |
| Actinpterygii | Anguilliformes   | Muraenidae    | <i>Gymnothorax meleagris</i>       | LC | 0 | 0 | 1 | 0 |
| Actinpterygii | Anguilliformes   | Muraenidae    | <i>Gymnothorax pictus</i>          | LC | 0 | 0 | 1 | 0 |
| Actinpterygii | Anguilliformes   | Muraenidae    | <i>Gymnothorax richardsonii</i>    | LC | 0 | 0 | 1 | 0 |
| Actinpterygii | Perciformes      | Nemipteridae  | <i>Scolopsis frenata</i>           | LC | 0 | 0 | 1 | 0 |
| Actinpterygii | Anguilliformes   | Ophichthidae  | <i>Myrichthys colubrinus</i>       | NE | 1 | 1 | 1 | 0 |
| Actinpterygii | Tetradontiformes | Ostraciidae   | <i>Lactoria fornasini</i>          | NE | 1 | 0 | 1 | 0 |
| Actinpterygii | Tetradontiformes | Ostraciidae   | <i>Ostracion cubicus</i>           | LC | 0 | 0 | 1 | 1 |
| Actinpterygii | Tetradontiformes | Ostraciidae   | <i>Ostracion meleagris</i>         | NE | 1 | 0 | 1 | 0 |
| Actinpterygii | Perciformes      | Pempheridae   | <i>Parapriacanthus ransonneti</i>  | NE | 0 | 0 | 1 | 0 |
| Actinpterygii | Perciformes      | Pempheridae   | <i>Pempheris adusta</i>            | NE | 0 | 0 | 1 | 0 |
| Actinpterygii | Trachiniformes   | Pinguipedidae | <i>Parapercis hexophthalma</i>     | NE | 1 | 0 | 1 | 0 |
| Actinpterygii | Trachiniformes   | Pinguipedidae | <i>Parapercis punctulata</i>       | NE | 0 | 0 | 1 | 0 |
| Actinpterygii | Trachiniformes   | Pinguipedidae | <i>Parapercis schauinslandii</i>   | NE | 0 | 0 | 1 | 0 |
| Actinpterygii | Siluriformes     | Plotosidae    | <i>Plotosus lineatus</i>           | NE | 0 | 0 | 1 | 0 |
| Actinpterygii | Perciformes      | Polynemidae   | <i>Polydactylus cf. sexfilis</i>   | NE | 1 | 0 | 1 | 0 |
| Actinpterygii | Perciformes      | Pomacanthidae | <i>Apolemichthys trimaculatus</i>  | LC | 1 | 0 | 1 | 0 |
| Actinpterygii | Perciformes      | Pomacanthidae | <i>Centropyge acanthops</i>        | LC | 1 | 0 | 1 | 0 |
| Actinpterygii | Perciformes      | Pomacanthidae | <i>Centropyge multispinis</i>      | LC | 1 | 0 | 1 | 0 |
| Actinpterygii | Perciformes      | Pomacanthidae | <i>Pomacanthus imperator</i>       | LC | 1 | 0 | 1 | 0 |
| Actinpterygii | Perciformes      | Pomacanthidae | <i>Pygoplites diacanthus</i>       | LC | 1 | 0 | 1 | 0 |
| Actinpterygii | Perciformes      | Pomacentridae | <i>Abudefduf notatus</i>           | LC | 0 | 0 | 1 | 0 |
| Actinpterygii | Perciformes      | Pomacentridae | <i>Abudefduf septemfasciatus</i>   | LC | 1 | 0 | 1 | 0 |
| Actinpterygii | Perciformes      | Pomacentridae | <i>Abudefduf sexfasciatus</i>      | LC | 0 | 0 | 1 | 0 |
| Actinpterygii | Perciformes      | Pomacentridae | <i>Abudefduf sordidus</i>          | LC | 1 | 0 | 1 | 0 |

|               |             |               |                                         |    |   |   |   |   |
|---------------|-------------|---------------|-----------------------------------------|----|---|---|---|---|
| Actinpterygii | Perciformes | Pomacentridae | <i>Abudefduf vaigiensis</i>             | LC | 0 | 1 | 1 | 0 |
| Actinpterygii | Perciformes | Pomacentridae | <i>Amphiprion akallopisos</i>           | LC | 1 | 0 | 1 | 0 |
| Actinpterygii | Perciformes | Pomacentridae | <i>Amphiprion fuscocaudatus</i>         | LC | 1 | 0 | 1 | 0 |
| Actinpterygii | Perciformes | Pomacentridae | <i>Chromis atripectoralis</i>           | NE | 1 | 0 | 1 | 0 |
| Actinpterygii | Perciformes | Pomacentridae | <i>Chromis dimidiata</i>                | LC | 1 | 0 | 1 | 0 |
| Actinpterygii | Perciformes | Pomacentridae | <i>Chromis lepidolepis</i>              | NE | 1 | 0 | 1 | 0 |
| Actinpterygii | Perciformes | Pomacentridae | <i>Chromis nigrura</i>                  | NE | 0 | 0 | 1 | 0 |
| Actinpterygii | Perciformes | Pomacentridae | <i>Chromis opercularis</i>              | NE | 0 | 0 | 1 | 0 |
| Actinpterygii | Perciformes | Pomacentridae | <i>Chromis ternatensis</i>              | NE | 1 | 0 | 1 | 0 |
| Actinpterygii | Perciformes | Pomacentridae | <i>Chromis viridis</i>                  | NE | 1 | 0 | 1 | 0 |
| Actinpterygii | Perciformes | Pomacentridae | <i>Chromis weberi</i>                   | NE | 0 | 0 | 1 | 0 |
| Actinpterygii | Perciformes | Pomacentridae | <i>Chromis xutha</i>                    | NE | 0 | 0 | 1 | 0 |
| Actinpterygii | Perciformes | Pomacentridae | <i>Chrysiptera biocellata</i>           | NE | 1 | 0 | 1 | 0 |
| Actinpterygii | Perciformes | Pomacentridae | <i>Chrysiptera brownriggii</i>          | NE | 1 | 0 | 1 | 0 |
| Actinpterygii | Perciformes | Pomacentridae | <i>Chrysiptera glauca</i>               | NE | 1 | 0 | 1 | 0 |
| Actinpterygii | Perciformes | Pomacentridae | <i>Dascyllus aruanus</i>                | NE | 1 | 0 | 1 | 0 |
| Actinpterygii | Perciformes | Pomacentridae | <i>Dascyllus carneus</i>                | NE | 1 | 0 | 1 | 0 |
| Actinpterygii | Perciformes | Pomacentridae | <i>Dascyllus trimaculatus</i>           | NE | 1 | 0 | 1 | 0 |
| Actinpterygii | Perciformes | Pomacentridae | <i>Lepidozygus tapeinosoma</i>          | NE | 1 | 0 | 1 | 0 |
| Actinpterygii | Perciformes | Pomacentridae | <i>Plectroglyphidodon dickii</i>        | NE | 1 | 0 | 1 | 0 |
| Actinpterygii | Perciformes | Pomacentridae | <i>Plectroglyphidodon imparipennis</i>  | NE | 0 | 0 | 1 | 0 |
| Actinpterygii | Perciformes | Pomacentridae | <i>Plectroglyphidodon johnstonianus</i> | NE | 0 | 0 | 1 | 0 |
| Actinpterygii | Perciformes | Pomacentridae | <i>Plectroglyphidodon lacrymatus</i>    | NE | 1 | 0 | 1 | 0 |
| Actinpterygii | Perciformes | Pomacentridae | <i>Plectroglyphidodon leucozonus</i>    | NE | 0 | 0 | 1 | 0 |
| Actinpterygii | Perciformes | Pomacentridae | <i>Pomacentrus caeruleus</i>            | NE | 1 | 0 | 1 | 0 |
| Actinpterygii | Perciformes | Pomacentridae | <i>Pomacentrus sulfureus</i>            | NE | 1 | 0 | 1 | 0 |
| Actinpterygii | Perciformes | Pomacentridae | <i>Stegastes fasciolatus</i>            | NE | 0 | 0 | 1 | 0 |
| Actinpterygii | Perciformes | Pomacentridae | <i>Stegastes nigricans</i>              | NE | 1 | 0 | 1 | 0 |
| Actinpterygii | Perciformes | Pomacentridae | <i>Stegastes punctatus</i>              | NE | 0 | 0 | 1 | 0 |
| Actinpterygii | Perciformes | Priacanthidae | <i>Priacanthus hamrur</i>               | LC | 0 | 0 | 1 | 0 |
| Actinpterygii | Labriformes | Scaridae      | <i>Calotomus carolinus</i>              | LC | 1 | 1 | 1 | 0 |
| Actinpterygii | Labriformes | Scaridae      | <i>Calotomus spinidens</i>              | LC | 0 | 1 | 1 | 0 |
| Actinpterygii | Labriformes | Scaridae      | <i>Cetoscarus bicolor</i>               | LC | 0 | 0 | 1 | 0 |
| Actinpterygii | Labriformes | Scaridae      | <i>Chlorurus sordidus</i>               | LC | 1 | 0 | 1 | 0 |

|               |                 |              |                                     |    |   |   |   |   |
|---------------|-----------------|--------------|-------------------------------------|----|---|---|---|---|
| Actinpterygii | Labriformes     | Scaridae     | <i>Chlorurus strongylocephalus</i>  | LC | 0 | 0 | 1 | 0 |
| Actinpterygii | Labriformes     | Scaridae     | <i>Chlorurus capistratooides</i>    | LC | 1 | 0 | 1 | 0 |
| Actinpterygii | Labriformes     | Scaridae     | <i>Hipposcarus harid</i>            | LC | 0 | 0 | 0 | 0 |
| Actinpterygii | Labriformes     | Scaridae     | <i>Leptoscarus vaigiensis</i>       | LC | 1 | 1 | 1 | 0 |
| Actinpterygii | Labriformes     | Scaridae     | <i>Scarus cf. ghobban</i>           | LC | 1 | 0 | 1 | 0 |
| Actinpterygii | Labriformes     | Scaridae     | <i>Scarus festivus</i>              | LC | 1 | 0 | 1 | 0 |
| Actinpterygii | Labriformes     | Scaridae     | <i>Scarus frenatus</i>              | LC | 1 | 0 | 1 | 0 |
| Actinpterygii | Labriformes     | Scaridae     | <i>Scarus ghobban</i>               | LC | 1 | 0 | 1 | 0 |
| Actinpterygii | Labriformes     | Scaridae     | <i>Scarus niger</i>                 | LC | 1 | 0 | 1 | 0 |
| Actinpterygii | Labriformes     | Scaridae     | <i>Scarus prasiognathos</i>         | LC | 1 | 0 | 1 | 0 |
| Actinpterygii | Labriformes     | Scaridae     | <i>Scarus psittacus</i>             | LC | 1 | 0 | 1 | 0 |
| Actinpterygii | Labriformes     | Scaridae     | <i>Scarus rubroviolaceus</i>        | LC | 1 | 0 | 1 | 0 |
| Actinpterygii | Labriformes     | Scaridae     | <i>Scarus russelii</i>              | LC | 1 | 0 | 1 | 0 |
| Actinpterygii | Labriformes     | Scaridae     | <i>Scarus scaber</i>                | LC | 1 | 0 | 1 | 0 |
| Actinpterygii | Labriformes     | Scaridae     | <i>Scarus tricolor</i>              | LC | 1 | 0 | 1 | 0 |
| Actinpterygii | Labriformes     | Scaridae     | <i>Scarus viridifucatus</i>         | LC | 0 | 0 | 1 | 0 |
| Actinpterygii | Scombriformes   | Scombridae   | <i>Acanthocybium solandri</i>       | LC | 0 | 0 | 0 | 1 |
| Actinpterygii | Scombriformes   | Scombridae   | <i>Euthynnus affinis</i>            | LC | 0 | 0 | 0 | 1 |
| Actinpterygii | Scombriformes   | Scombridae   | <i>Gymnosarda unicolor</i>          | LC | 0 | 0 | 1 | 1 |
| Actinpterygii | Scombriformes   | Scombridae   | <i>Katsuwonus pelamis</i>           | LC | 0 | 0 | 0 | 1 |
| Actinpterygii | Scombriformes   | Scombridae   | <i>Rastrelliger kanagurta</i>       | DD | 0 | 0 | 0 | 1 |
| Actinpterygii | Scombriformes   | Scombridae   | <i>Thunnus albacares</i>            | LC | 0 | 0 | 0 | 1 |
| Actinpterygii | Scorpaeniformes | Scorpaenidae | <i>Caracanthus madagascariensis</i> | NE | 0 | 0 | 1 | 0 |
| Actinpterygii | Scorpaeniformes | Scorpaenidae | <i>Caracanthus unipinna</i>         | LC | 0 | 0 | 1 | 0 |
| Actinpterygii | Scorpaeniformes | Scorpaenidae | <i>Pterois antennata</i>            | LC | 0 | 0 | 1 | 0 |
| Actinpterygii | Scorpaeniformes | Scorpaenidae | <i>Pterois miles</i>                | LC | 0 | 0 | 1 | 0 |
| Actinpterygii | Scorpaeniformes | Scorpaenidae | <i>Pterois radiata</i>              | LC | 0 | 0 | 1 | 0 |
| Actinpterygii | Scorpaeniformes | Scorpaenidae | <i>Scorpaenodes cf. vittapinna</i>  | NE | 0 | 0 | 1 | 0 |
| Actinpterygii | Scorpaeniformes | Scorpaenidae | <i>Scorpaenopsis diabolus</i>       | LC | 0 | 0 | 1 | 0 |
| Actinpterygii | Scorpaeniformes | Scorpaenidae | <i>Sebastapistes cyanostigma</i>    | LC | 0 | 0 | 1 | 0 |
| Actinpterygii | Scorpaeniformes | Scorpaenidae | <i>Sebastapistes strongia</i>       | LC | 0 | 0 | 1 | 0 |
| Actinpterygii | Scorpaeniformes | Scorpaenidae | <i>Taenianotus triacanthus</i>      | LC | 0 | 0 | 1 | 0 |
| Actinpterygii | Perciformes     | Serranidae   | <i>Aethaloperca rogaa</i>           | LC | 0 | 0 | 1 | 0 |
| Actinpterygii | Perciformes     | Serranidae   | <i>Cephalopholis argus</i>          | LC | 0 | 0 | 1 | 0 |

|               |                  |              |                                      |    |   |   |   |   |
|---------------|------------------|--------------|--------------------------------------|----|---|---|---|---|
| Actinpterygii | Perciformes      | Serranidae   | <i>Cephalopholis leopardus</i>       | LC | 0 | 0 | 1 | 0 |
| Actinpterygii | Perciformes      | Serranidae   | <i>Cephalopholis miniata</i>         | LC | 0 | 0 | 1 | 0 |
| Actinpterygii | Perciformes      | Serranidae   | <i>Cephalopholis nigripinnis</i>     | LC | 0 | 0 | 1 | 0 |
| Actinpterygii | Perciformes      | Serranidae   | <i>Cephalopholis sexmaculata</i>     | LC | 0 | 0 | 1 | 0 |
| Actinpterygii | Perciformes      | Serranidae   | <i>Cephalopholis sonnerati</i>       | LC | 0 | 0 | 1 | 0 |
| Actinpterygii | Perciformes      | Serranidae   | <i>Cephalopholis spiloparaea</i>     | LC | 0 | 0 | 1 | 0 |
| Actinpterygii | Perciformes      | Serranidae   | <i>Dermatolepis striolata</i>        | LC | 0 | 0 | 1 | 0 |
| Actinpterygii | Perciformes      | Serranidae   | <i>Epinephelus caeruleopunctatus</i> | LC | 0 | 0 | 1 | 0 |
| Actinpterygii | Perciformes      | Serranidae   | <i>Epinephelus cf. chlorostigma</i>  | LC | 1 | 1 | 1 | 0 |
| Actinpterygii | Perciformes      | Serranidae   | <i>Epinephelus fasciatus</i>         | LC | 0 | 1 | 1 | 0 |
| Actinpterygii | Perciformes      | Serranidae   | <i>Epinephelus fuscoguttatus</i>     | VU | 0 | 0 | 1 | 1 |
| Actinpterygii | Perciformes      | Serranidae   | <i>Epinephelus macrospilos</i>       | LC | 0 | 0 | 1 | 0 |
| Actinpterygii | Perciformes      | Serranidae   | <i>Epinephelus merra</i>             | LC | 0 | 0 | 1 | 0 |
| Actinpterygii | Perciformes      | Serranidae   | <i>Epinephelus multinotatus</i>      | LC | 0 | 0 | 1 | 0 |
| Actinpterygii | Perciformes      | Serranidae   | <i>Epinephelus polyphemadion</i>     | VU | 1 | 0 | 1 | 1 |
| Actinpterygii | Perciformes      | Serranidae   | <i>Epinephelus spilotoceps</i>       | LC | 0 | 0 | 1 | 0 |
| Actinpterygii | Perciformes      | Serranidae   | <i>Epinephelus tauvina</i>           | DD | 1 | 0 | 1 | 0 |
| Actinpterygii | Perciformes      | Serranidae   | <i>Epinephelus tukula</i>            | LC | 0 | 0 | 1 | 0 |
| Actinpterygii | Perciformes      | Serranidae   | <i>Nemanthias carberryi</i>          | LC | 0 | 0 | 1 | 1 |
| Actinpterygii | Perciformes      | Serranidae   | <i>Plectropomus laevis</i>           | LC | 0 | 0 | 1 | 0 |
| Actinpterygii | Perciformes      | Serranidae   | <i>Plectropomus punctatus</i>        | LC | 0 | 0 | 1 | 0 |
| Actinpterygii | Perciformes      | Serranidae   | <i>Pogonoperca ocellata</i>          | LC | 0 | 0 | 1 | 1 |
| Actinpterygii | Perciformes      | Serranidae   | <i>Pseudanthias cooperi</i>          | LC | 0 | 0 | 1 | 0 |
| Actinpterygii | Perciformes      | Serranidae   | <i>Pseudanthias evansi</i>           | LC | 1 | 0 | 1 | 1 |
| Actinpterygii | Perciformes      | Serranidae   | <i>Pseudanthias pulcherrimus</i>     | LC | 0 | 0 | 1 | 1 |
| Actinpterygii | Perciformes      | Serranidae   | <i>Pseudanthias squamipinnis</i>     | LC | 0 | 0 | 1 | 0 |
| Actinpterygii | Perciformes      | Serranidae   | <i>Variola albimarginata</i>         | LC | 0 | 0 | 1 | 0 |
| Actinpterygii | Perciformes      | Serranidae   | <i>Variola louti</i>                 | LC | 0 | 0 | 1 | 0 |
| Actinpterygii | Perciformes      | Siganidae    | <i>Siganus argenteus</i>             | LC | 0 | 1 | 1 | 0 |
| Actinpterygii | Perciformes      | Siganidae    | <i>Siganus rivulatus</i>             | LC | 0 | 0 | 1 | 0 |
| Actinpterygii | Perciformes      | Siganidae    | <i>Siganus stellatus</i>             | LC | 1 | 1 | 1 | 0 |
| Actinpterygii | Perciformes      | Siganidae    | <i>Siganus sutor</i>                 | LC | 0 | 1 | 1 | 0 |
| Actinpterygii | Istiophoriformes | Sphyraenidae | <i>Sphyraena barracuda</i>           | LC | 0 | 0 | 0 | 1 |
| Actinpterygii | Istiophoriformes | Sphyraenidae | <i>Sphyraena genie</i>               | NE | 0 | 0 | 0 | 1 |

|                |                   |                |                                      |    |   |   |   |   |
|----------------|-------------------|----------------|--------------------------------------|----|---|---|---|---|
| Actinpterygii  | Syngnathiformes   | Syngnathidae   | <i>Corythoichthys flavofasciatus</i> | LC | 0 | 0 | 1 | 0 |
| Actinpterygii  | Syngnathiformes   | Syngnathidae   | <i>Doryrhamphus excisus excisus</i>  | LC | 1 | 0 | 1 | 0 |
| Actinpterygii  | Syngnathiformes   | Syngnathidae   | <i>Dunckerocampus boylei</i>         | LC | 0 | 0 | 1 | 0 |
| Actinpterygii  | Aulopiformes      | Synodontidae   | <i>Saurida gracilis</i>              | LC | 0 | 1 | 1 | 0 |
| Actinpterygii  | Aulopiformes      | Synodontidae   | <i>Saurida nebulosa</i>              | LC | 1 | 1 | 0 | 0 |
| Actinpterygii  | Aulopiformes      | Synodontidae   | <i>Synodus dermatogenys</i>          | LC | 1 | 1 | 1 | 0 |
| Actinpterygii  | Aulopiformes      | Synodontidae   | <i>Synodus variegatus</i>            | LC | 1 | 1 | 1 | 0 |
| Actinpterygii  | Perciformes       | Terapontidae   | <i>Terapon theraps</i>               | LC | 0 | 0 | 1 | 1 |
| Actinpterygii  | Tetraodontiformes | Tetraodontidae | <i>Arothron caeruleopunctatus</i>    | LC | 0 | 0 | 1 | 0 |
| Actinpterygii  | Tetraodontiformes | Tetraodontidae | <i>Arothron hispidus</i>             | LC | 1 | 1 | 1 | 0 |
| Actinpterygii  | Tetraodontiformes | Tetraodontidae | <i>Arothron immaculatus</i>          | LC | 1 | 1 | 1 | 0 |
| Actinpterygii  | Tetraodontiformes | Tetraodontidae | <i>Arothron mappa</i>                | LC | 1 | 1 | 1 | 0 |
| Actinpterygii  | Tetraodontiformes | Tetraodontidae | <i>Arothron meleagris</i>            | LC | 1 | 0 | 1 | 0 |
| Actinpterygii  | Tetraodontiformes | Tetraodontidae | <i>Arothron nigropunctatus</i>       | LC | 1 | 0 | 1 | 0 |
| Actinpterygii  | Tetraodontiformes | Tetraodontidae | <i>Canthigaster amboinensis</i>      | LC | 1 | 0 | 1 | 0 |
| Actinpterygii  | Tetraodontiformes | Tetraodontidae | <i>Canthigaster bennetti</i>         | LC | 1 | 1 | 1 | 0 |
| Actinpterygii  | Tetraodontiformes | Tetraodontidae | <i>Canthigaster cyanospilota</i>     | LC | 1 | 0 | 1 | 0 |
| Actinpterygii  | Tetraodontiformes | Tetraodontidae | <i>Canthigaster janthinoptera</i>    | LC | 1 | 0 | 1 | 0 |
| Actinpterygii  | Tetraodontiformes | Tetraodontidae | <i>Canthigaster smithae</i>          | LC | 0 | 0 | 1 | 0 |
| Actinpterygii  | Tetraodontiformes | Tetraodontidae | <i>Canthigaster tyleri</i>           | LC | 1 | 0 | 1 | 0 |
| Actinpterygii  | Tetraodontiformes | Tetraodontidae | <i>Canthigaster valentini</i>        | LC | 1 | 1 | 1 | 0 |
| Actinpterygii  | Trachinotiformes  | Trichonotidae  | <i>Trichonotus cf. elegans</i>       | LC | 1 | 0 | 1 | 0 |
| Actinpterygii  | Acanthuriformes   | Zanclidae      | <i>Zanclus cornutus</i>              | LC | 1 | 0 | 1 | 0 |
| Chondrichthyes | Carcharhiniformes | Carcharhinidae | <i>Carcharhinus albimarginatus</i>   | VU | 0 | 0 | 1 | 1 |
| Chondrichthyes | Carcharhiniformes | Carcharhinidae | <i>Carcharhinus amblyrhynchos</i>    | EN | 0 | 0 | 1 | 1 |
| Chondrichthyes | Carcharhiniformes | Carcharhinidae | <i>Carcharhinus leucas</i>           | VU | 1 | 0 | 1 | 1 |
| Chondrichthyes | Carcharhiniformes | Carcharhinidae | <i>Carcharhinus melanopterus</i>     | VU | 1 | 1 | 1 | 1 |
| Chondrichthyes | Carcharhiniformes | Carcharhinidae | <i>Galeocerdo cuvier</i>             | NT | 0 | 0 | 0 | 1 |
| Chondrichthyes | Carcharhiniformes | Carcharhinidae | <i>Loxodon macrorhinus</i>           | NT | 0 | 0 | 1 | 1 |
| Chondrichthyes | Carcharhiniformes | Carcharhinidae | <i>Negaprion acutidens</i>           | EN | 1 | 1 | 1 | 1 |
| Chondrichthyes | Carcharhiniformes | Carcharhinidae | <i>Triaenodon obesus</i>             | VU | 0 | 0 | 1 | 1 |
| Chondrichthyes | Myliobatiformes   | Dasyatidae     | <i>Pastinachus ater</i>              | VU | 1 | 0 | 1 | 0 |
| Chondrichthyes | Myliobatiformes   | Dasyatidae     | <i>Pateobatis fai</i>                | VU | 1 | 1 | 1 | 1 |
| Chondrichthyes | Myliobatiformes   | Dasyatidae     | <i>Taeniurops meyeri</i>             | VU | 0 | 0 | 1 | 1 |

|                |                   |                 |                                |    |   |   |   |   |
|----------------|-------------------|-----------------|--------------------------------|----|---|---|---|---|
| Chondrichthyes | Myliobatiformes   | Dasyatidae      | <i>Urogymnus asperrimus</i>    | VU | 1 | 1 | 0 | 0 |
| Chondrichthyes | Myliobatiformes   | Dasyatidae      | <i>Urogymnus granulatus</i>    | VU | 1 | 1 | 1 | 1 |
| Chondrichthyes | Myliobatiformes   | Mobulidae       | <i>Mobula alfredi</i>          | VU | 0 | 0 | 1 | 1 |
| Chondrichthyes | Myliobatiformes   | Myliobatidae    | <i>Aetobatus ocellatus</i>     | VU | 1 | 0 | 1 | 1 |
| Chondrichthyes | Orectolobiformes  | Orectolobidae   | <i>Nebrius ferrugineus</i>     | VU | 1 | 1 | 1 | 1 |
| Chondrichthyes | Orectolobiformes  | Rhincodontidae  | <i>Rhincodon typus</i>         | EN | 0 | 0 | 0 | 1 |
| Chondrichthyes | Rhinopristiformes | Rhinobatidae    | <i>Rhynchobatus djiddensis</i> | CR | 1 | 0 | 1 | 1 |
| Chondrichthyes | Carcharhiniformes | Sphyrnidae      | <i>Sphyrna mokarran</i>        | CR | 0 | 0 | 0 | 1 |
| Mammalia       | Artiodactyla      | Balaenopteridae | <i>Balaenoptera musculus</i>   | EN | 0 | 0 | 0 | 1 |
| Mammalia       | Artiodactyla      | Balaenopteridae | <i>Megaptera novaeangliae</i>  | LC | 0 | 0 | 0 | 1 |
| Mammalia       | Artiodactyla      | Delphinidae     | <i>Grampus griseus</i>         | LC | 0 | 0 | 0 | 1 |
| Mammalia       | Artiodactyla      | Delphinidae     | <i>Peponocephala electra</i>   | LC | 0 | 0 | 0 | 1 |
| Mammalia       | Artiodactyla      | Delphinidae     | <i>Stenella longirostris</i>   | LC | 0 | 0 | 0 | 1 |
| Mammalia       | Artiodactyla      | Delphinidae     | <i>Tursiops truncatus</i>      | LC | 0 | 0 | 0 | 1 |
| Mammalia       | Artiodactyla      | Physeteridae    | <i>Physeter macrocephalus</i>  | VU | 0 | 0 | 0 | 1 |
| Reptilia       | Testudines        | Cheloniidae     | <i>Chelonia mydas</i>          | EN | 1 | 1 | 1 | 1 |
| Reptilia       | Testudines        | Cheloniidae     | <i>Eretmochelys imbricata</i>  | CR | 1 | 1 | 1 | 1 |

---
