# Supplementary material
Source: MDPI journal article supplement (https://www.mdpi.com/1424-2818/14/8/681)
Supplement: s1 [file s1]

Archive with 2 entries (2 files):
- diversity-1868596-proof_Supplementary Material_S2_refs_edited.pdf
- Table S1.pdf
